# Supplementary material for: Rural-Urban Disparities in Quality of Inpatient Psychiatric Care
Source: Atypon-hosted journal article supplement (doi:10.1176/appi.ps.20220277), 2022-11-02
Supplement: appi.ps.20220277.ds001.pdf [file appi.ps.20220277.ds001.pdf]

## **Appendix Methods.**

CMS quality metrics are calculated across varying populations, as appropriate for each metric.

- For follow-up measures, CMS calculated facility-specific percentages of all Medicare Fee-For-Service discharges who had subsequent outpatient claims from any providers.
- The appropriate justification for multiple antipsychotic medication measure was calculated only for patients discharged on two or more routinely scheduled antipsychotic medications. CMS calculated facility-specific proportions of these eligible discharges whose medical records documented any of the following justifications: 1) minimum of three failed trials with monotherapy, 2) a plan that tapers to monotherapy or cross-tapering (defined as decreasing “the dosage of one or more antipsychotic medications while increasing the dosage of another to a level that manages the patient’s symptoms with one antipsychotic medication”), or 3) augmentation of Clozapine – a gold standard antipsychotic drug for treatment-resistant schizophrenia.
- For transition record measures, the cohorts included all patients, regardless of age, discharged from the facility to home/self-care or any other site of care, excluding patients who died or left against medical advice. CMS calculated the percentages of these eligible discharged patients or their caregivers receiving a transition record that captured all elements of inpatient care, post-discharge and patient self-management instructions, advance care plan, contact information or plan for follow-up care, within 24 hours of discharge.
- For the two patient experience measures, all patients admitted to hospital-based psychiatric setting were included. CMS evaluated the number of minutes that psychiatric inpatients in a facility were maintained in physical restraint and/or seclusion and converted to number of hours.

Appendix Table 1. Number of Eligible Inpatient Psychiatric Facilities to IPFOR and Included Facilities by Measure, Year, and Hospital Location

|         |                      | <b>2,015</b>                                                             | <b>2,016</b> | <b>2,017</b> | <b>2,018</b> | <b>2,019</b> |
|---------|----------------------|--------------------------------------------------------------------------|--------------|--------------|--------------|--------------|
|         |                      | <b>Number of Inpatient Psychiatric Facilities Participating in IPFOR</b> |              |              |              |              |
| All     | Urban                | 1,254                                                                    | 1,264        | 1,257        | 1,229        | 1,231        |
|         | Rural Micropolitan   | 260                                                                      | 261          | 247          | 246          | 234          |
|         | Rural Small/Isolated | 130                                                                      | 128          | 126          | 124          | 119          |
|         |                      | <b>2015</b>                                                              | <b>2016</b>  | <b>2017</b>  | <b>2018</b>  | <b>2019</b>  |
|         |                      | <b>Number of Reported Facilities</b>                                     |              |              |              |              |
| FUH_30  | Urban                | 1,074                                                                    | 1,082        | 1,137        | 1,107        | 1,104        |
|         | Rural Micropolitan   | 192                                                                      | 182          | 210          | 196          | 198          |
|         | Rural Small/Isolated | 82                                                                       | 75           | 111          | 107          | 96           |
| FUH_7   | Urban                | 945                                                                      | 968          | 1,137        | 1,107        | 1,104        |
|         | Rural Micropolitan   | 140                                                                      | 127          | 210          | 196          | 198          |
|         | Rural Small/Isolated | 59                                                                       | 46           | 111          | 107          | 96           |
| TR_1    | Urban                | -                                                                        | -            | 1,234        | 1,210        | 1,215        |
|         | Rural Micropolitan   | -                                                                        | -            | 235          | 233          | 228          |
|         | Rural Small/Isolated | -                                                                        | -            | 123          | 119          | 115          |
| TR_2    | Urban                | -                                                                        | -            | 1,232        | 1,208        | 1,215        |
|         | Rural Micropolitan   | -                                                                        | -            | 234          | 234          | 228          |
|         | Rural Small/Isolated | -                                                                        | -            | 123          | 118          | 115          |
| HBIPS_2 | Urban                | 1,238                                                                    | 1,245        | 1,246        | 1,212        | 1,216        |
|         | Rural Micropolitan   | 253                                                                      | 247          | 238          | 232          | 228          |
|         | Rural Small/Isolated | 122                                                                      | 123          | 123          | 115          | 112          |
| HBIPS_3 | Urban                | 1,233                                                                    | 1,241        | 1,246        | 1,208        | 1,216        |
|         | Rural Micropolitan   | 254                                                                      | 246          | 238          | 232          | 228          |
|         | Rural Small/Isolated | 122                                                                      | 122          | 123          | 119          | 112          |
| HBIPS_5 | Urban                | 574                                                                      | 632          | 879          | 858          | 892          |
|         | Rural Micropolitan   | 89                                                                       | 93           | 135          | 142          | 135          |
|         | Rural Small/Isolated | 42                                                                       | 38           | 58           | 66           | 61           |

Notes: - refers to not available.

Appendix Figure 1. Scatterplot of Facility-level Patient Safety Measure Performance across Urban, Large Rural, and Small/Isolated Rural Facilities by Year

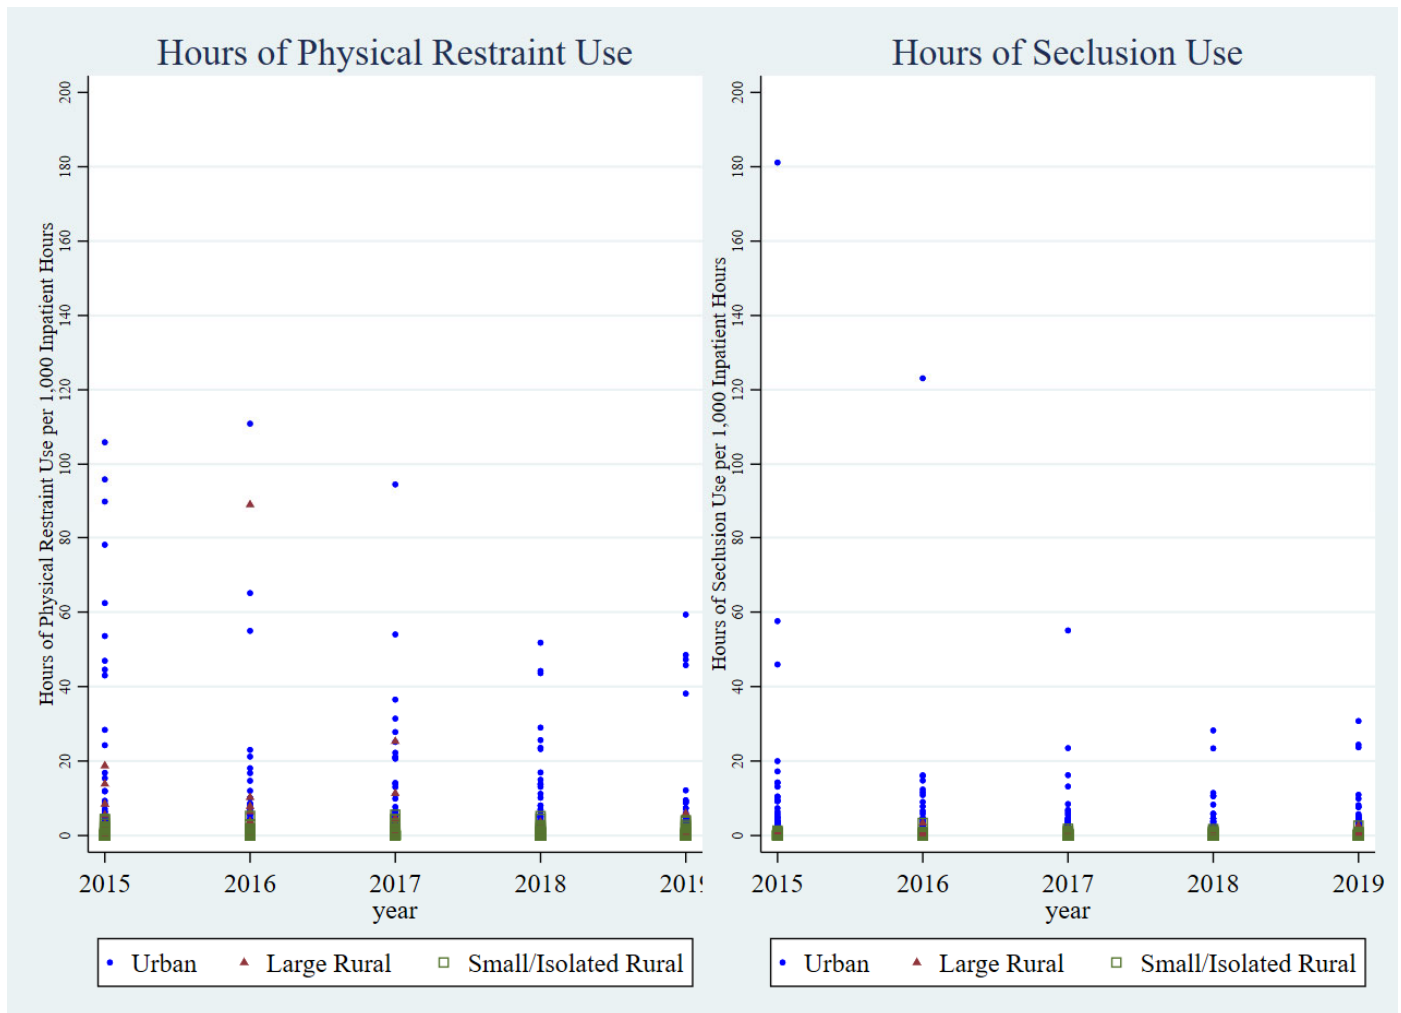

Notes: Centers for Medicare and Medicaid Services calculated the total number of hours (converted from minutes to the second decimal point) that each psychiatric unit maintained their psychiatric inpatients in physical restraint or seclusion during a year and divided it by the total number of psychiatric inpatient hours, excluding total leave days.

Appendix Figure 2. Follow-Up After Hospitalization for Mental Illness within 7 Days Post-Discharge

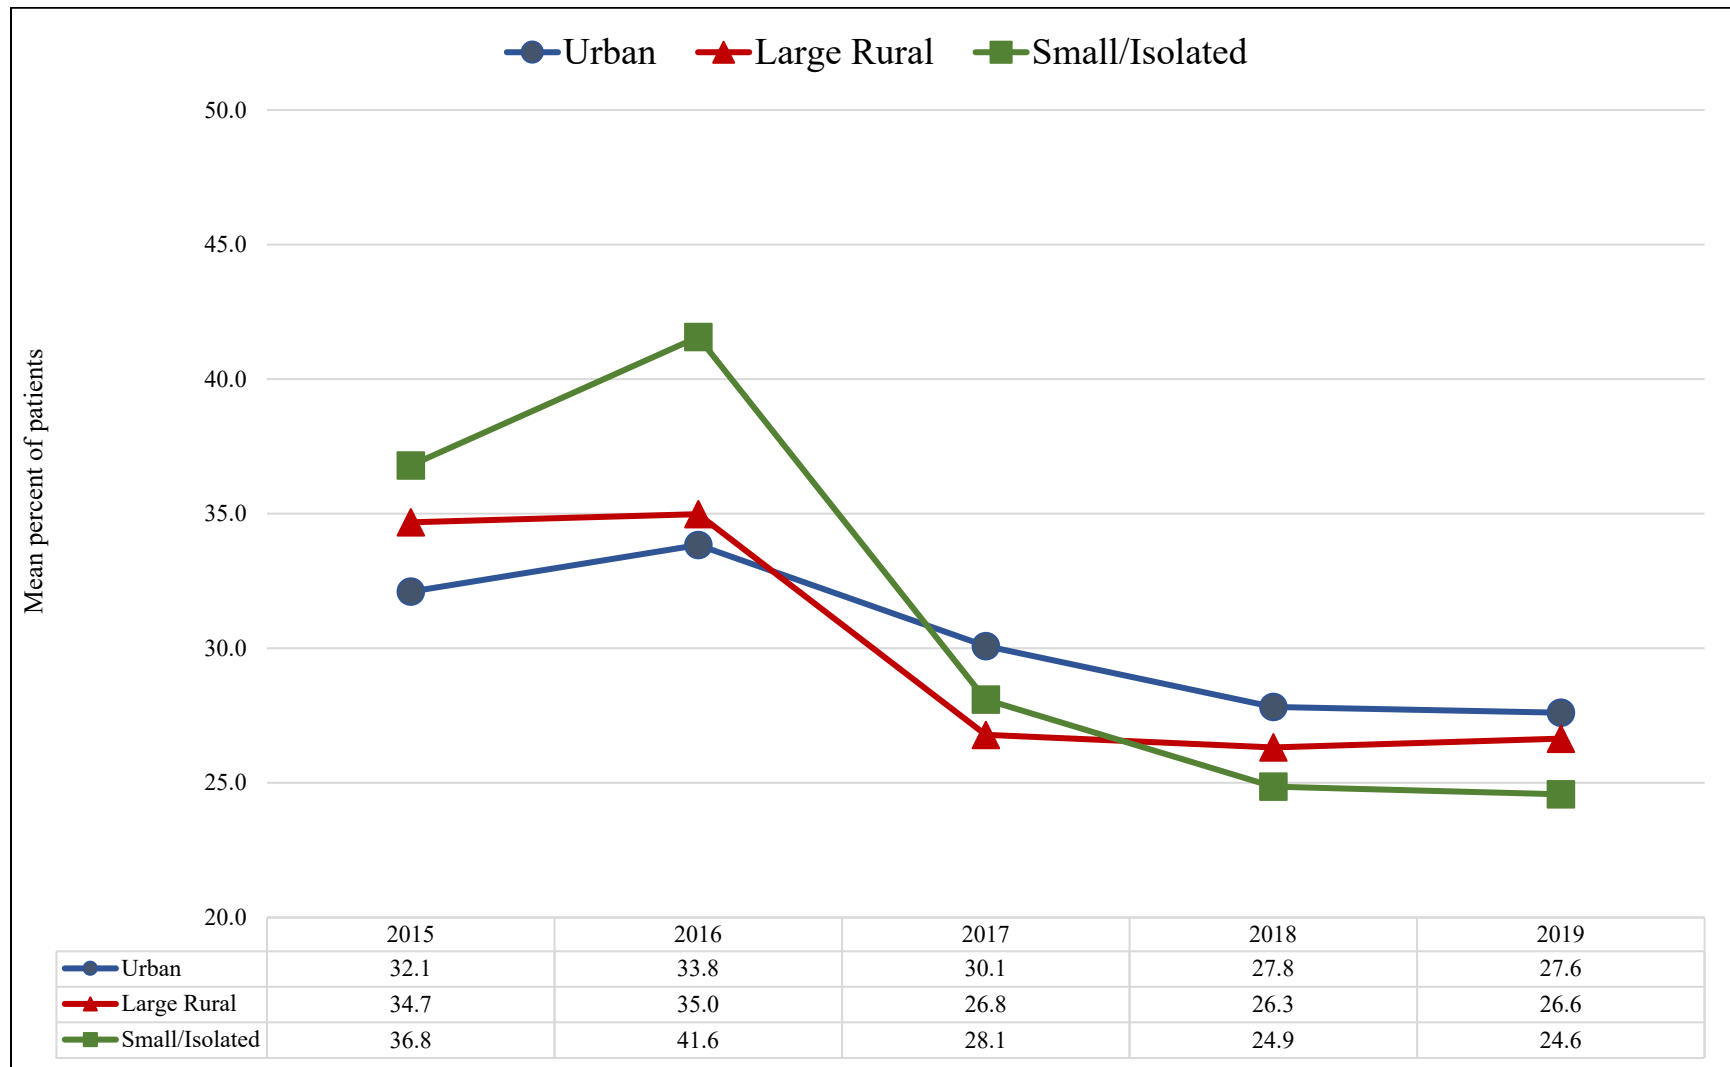

Notes: Inpatient psychiatric quality performance scores may range from 0 to 100, with a higher score indicating better performance. The scores reflect the average percentages of inpatient discharges for a diagnosis of mental illness or intentional self-harm among patients age 6 years and older that resulted in follow-up care with a mental health provider within 7 days.

Appendix Figure 3. Patients Discharged on Multiple Antipsychotic Medications with Appropriate Justification

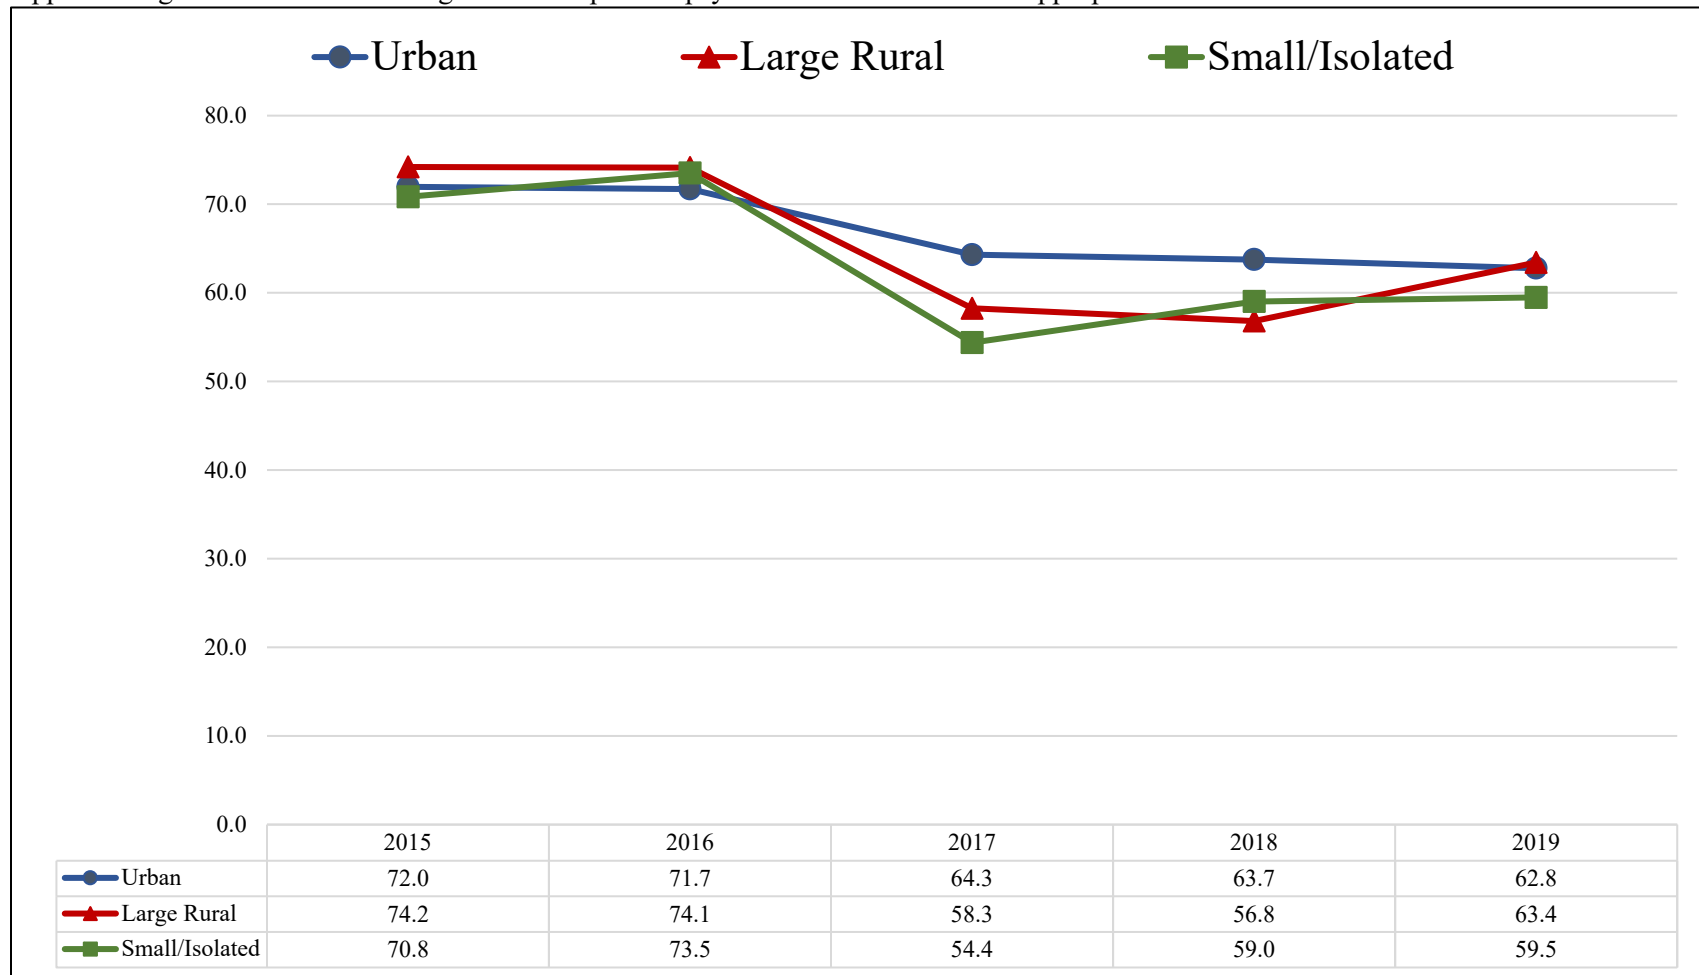

Notes: Inpatient psychiatric quality performance scores may range from 0 to 100, with a higher score indicating better performance. The scores reflect the average percentages of psychiatric inpatient discharges on two or more routinely scheduled antipsychotic medications, excluding those who expired, with an unplanned departure resulting in discharge due to elopement or failing to return from leave, and with a length of stay  $\leq 3$  days, whose medical records contain documentation of any of the following: 1) a history of a minimum of three failed multiple trials of monotherapy, 2) a recommended plan to taper to monotherapy due to previous use of multiple antipsychotic medications OR documentation of a cross-taper in progress at the time of discharge, and 3) augmentation of Clozapine..

Appendix Figure 4. Transition Record with Specified Elements Received by Discharged Patients

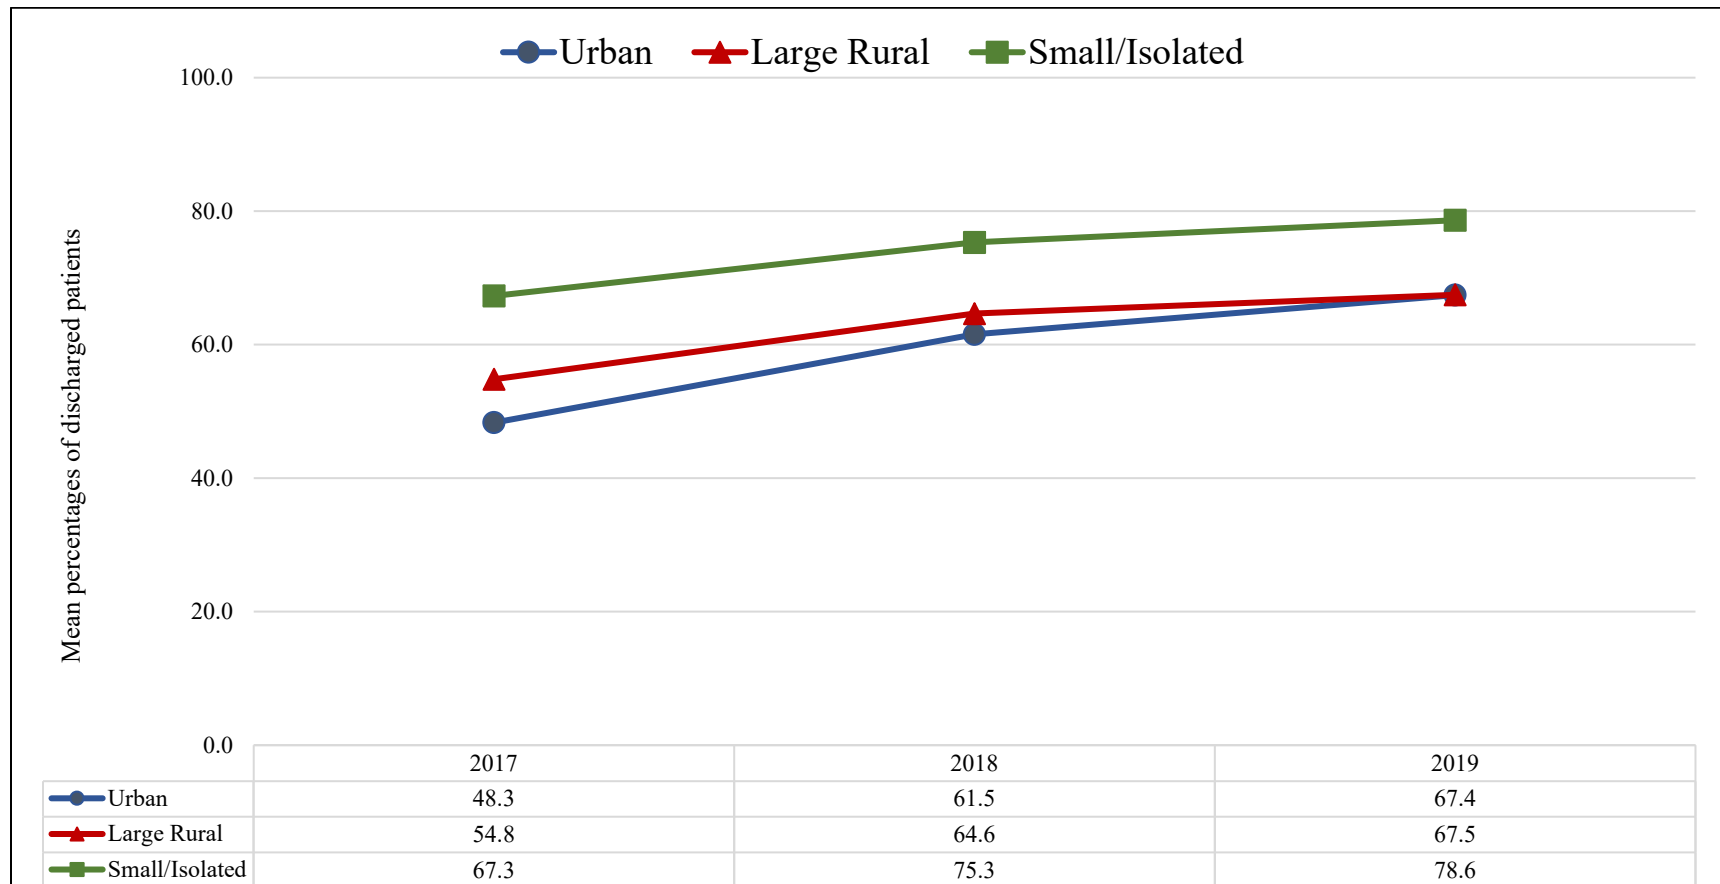

Notes: Inpatient psychiatric quality performance scores may range from 0 to 100, with a higher score indicating better performance. The scores reflect the average percentages of inpatient discharged patients, regardless of age, or their caregiver(s) who received a transition record including all the specified elements: 24-hour/7-day contact information, including physician for emergencies related to inpatient stay, contact information for obtaining results of studies pending at discharge, plan for follow-up care, and primary physician, other health care professional, or site designated for follow-up care.

Appendix Figure 5. Patient Safety Measures - Proportion of Hospitals with At Least One Physical Restraint or Seclusion Event During a Year

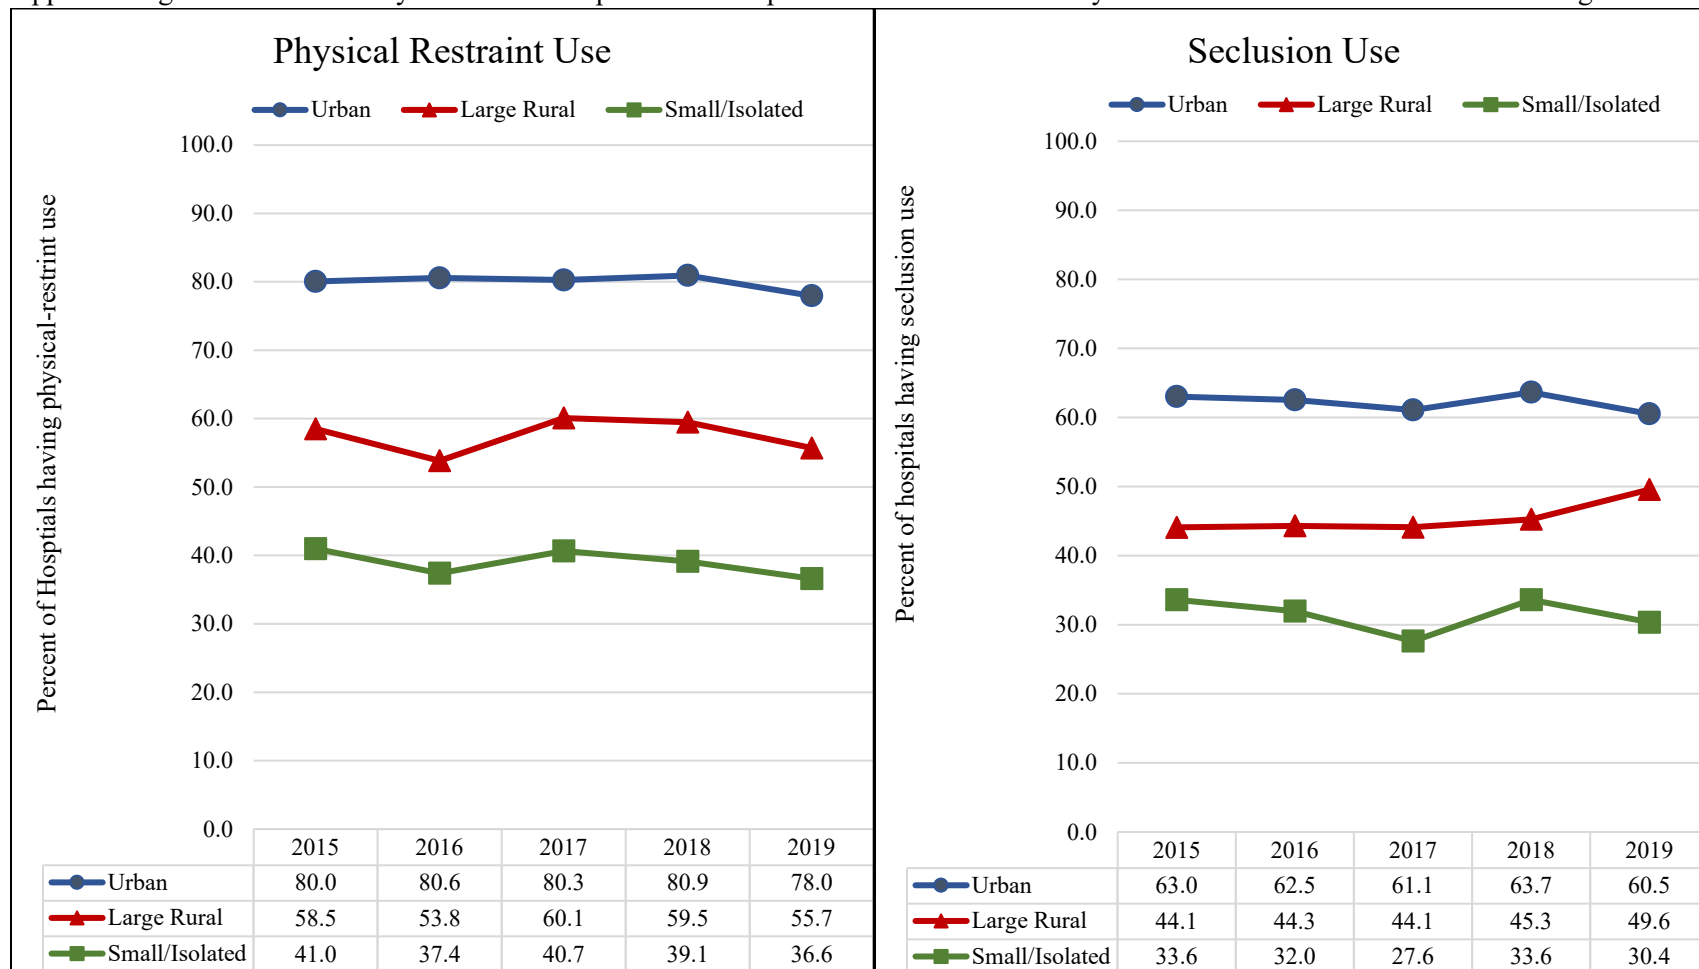

Notes: Proportion of hospitals with at least one physical restraint or seclusion event during a year, with a higher percentage indicating worse performance. Centers for Medicare and Medicaid Services calculated the total number of hours (converted from minutes to the second decimal point) that each psychiatric unit maintained their psychiatric inpatients in physical restraint or seclusion during a year and divided it by the total number of psychiatric inpatient hours, excluding total leave days. Due to the majority of facilities reporting zero hours, authors identified facilities with and without any physical restraint or seclusion use during a given year. The continuous variable distributions were presented in Appendix Figure 1.
